# Supplementary material
Source: PubMed Central journal article supplement (PMC6202150)
Supplement: NIHMS978150-supplement-GRAPHIC_ABSTRACT.pdf [file NIHMS978150-supplement-GRAPHIC_ABSTRACT.pdf]

# HDL Metrics

HDL-P via Ion-Mobility

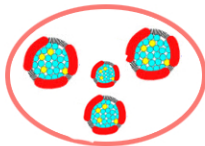

Particles Concentration  
"μmol/L"

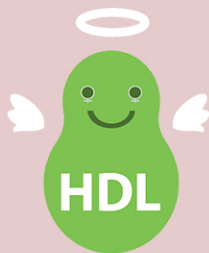

Good Cholesterol

HDL-C

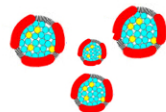

Total Cholesterol Carried  
by HDL Particles "mg/dL"

## HDL Metrics & Atherosclerosis Risk in Postmenopausal Women

↑ Large HDL-P

↑ Small HDL-P

↑ Total HDL-P

↑ HDL-C

Atherosclerosis Risk

↑ Risk

Close to menopause

↓ Risk

Later in life

↓ Risk

Irrespective of menopausal characteristics

↑ Risk

In women with older  
age at menopause

In women > 10 years  
postmenopausal
