# Supplementary material
Source: PubMed Central journal article supplement (PMC6202150)
Supplement: NIHMS978150-supplement-Supplemental_materials.pdf [file NIHMS978150-supplement-Supplemental_materials.pdf]

**SUPPLEMENTAL MATERIAL**

**Table I: Univariate Associations between Study Covariates and Carotid Measures**

| Study Variable                                                               | Mean cIMT, um  |         | Presence of cPlaque  |         |
|------------------------------------------------------------------------------|----------------|---------|----------------------|---------|
|                                                                              | $\beta$ (SE)   | P value | OR (95%CI)           | P value |
| Age, Year                                                                    | 8.83(0.42)     | <.0001  | 1.077 (1.065, 1.090) | <.0001  |
| Race / Ethnicity                                                             |                | <.0001  |                      | 0.01    |
| White                                                                        | -----          |         | -----                |         |
| Chinese American                                                             | 19.34(15.24)   | 0.20    | 0.604(0.432, 0.845)  | 0.006   |
| African American                                                             | 65.65(12.48)   | <.0001  | 1.011 (0.773, 1.321) | 0.05    |
| Hispanic                                                                     | 19.54(13.28)   | 0.14    | 0.821 (0.617, 1.092) | 0.81    |
| Age at menopause                                                             | 1.54(0.91)     | 0.09    | 1.005 (0.986, 1.025) | 0.57    |
| Time since menopause                                                         | 6.40(0.51)     | <.0001  | 1.049 (1.036, 1.062) | <.0001  |
| Menopausal Status                                                            |                | <.0001  |                      | <.0001  |
| Surgical menopause                                                           | 0.51(11.97)    | 0.95    | 0.899 (0.688, 1.174) | <.0001  |
| Natural menopause                                                            | -----          |         | -----                |         |
| perimenopause                                                                | -145.13(12.80) | <.0001  | 0.210 (0.149, 0.296) | <.0001  |
| BMI, Kg/m <sup>2</sup>                                                       | 1.98(0.81)     | 0.01    | 0.998 (0.982, 1.027) | 0.85    |
| SBP, mmHg                                                                    | 3.31(0.20)     | <.0001  | 1.022 (1.017, 1.027) | <.0001  |
| Smoking status                                                               |                | 0.026   |                      | 0.005   |
| Never                                                                        | -----          |         | -----                |         |
| Former                                                                       | 18.84(11.28)   | 0.10    | 1.389 (1.092, 1.767) | 0.008   |
| Current                                                                      | -28.03(16.33)  | 0.09    | 1.542 (1.085, 2.192) | 0.02    |
| Intentional physical activity, metabolic equivalent task (MET) minutes/week* | -1.27(1.62)    | 0.43    | 0.989 (0.955, 1.023) | 0.51    |
| Hypertension                                                                 | 109.00(9.49)   | <.0001  | 2.451 (1.974, 3.044) | <.0001  |
| Diabetes                                                                     | 81.68(16.00)   | <.0001  | 2.022 (1.421, 2.878) | <.0001  |
| Antihypertensive medications                                                 | 81.45(10.06)   | <.0001  | 2.127 (1.702, 2.659) | <.0001  |
| Lipid lowering medications                                                   | 44.37(13.54)   | 0.001   | 2.694 (1.983, 3.660) | <.0001  |
| Ever use hormone replacement therapy                                         | -17.14(10.41)  | 0.10    | 1.078 (0.864, 1.346) | 0.51    |
| CRP, mg/L*                                                                   | 20.00(4.21)    | <.0001  | 1.098 (1.003,1.202)  | 0.043   |
| IL-6, pg/mL*                                                                 | 45.27(7.31)    | <.0001  | 1.412 (1.202, 1.660) | <.0001  |
| Lipids, mg/dL                                                                |                |         |                      |         |
| HDL-C                                                                        | -0.84(0.32)    | 0.009   | 1.006 (0.999, 1.013) | 0.09    |

|                                              |              |        |                      |        |
|----------------------------------------------|--------------|--------|----------------------|--------|
| LDL-C                                        | 0.42(0.16)   | 0.007  | 1.004 (1.001, 1.008) | 0.01   |
| Total cholesterol                            | 0.38(0.14)   | 0.007  | 1.006 (1.003, 1.009) | 0.0004 |
| Triglycerides *                              | 37.01(9.76)  | 0.0002 | 1.236 (1.002, 1.525) | 0.048  |
| Ion mobility particle concentrations, umol/L |              |        |                      |        |
| Total HDL-P                                  | -0.91(0.90)  | 0.31   | 1.015 (0.999, 1.035) | 0.14   |
| Large HDL-P                                  | -2.25(2.63)  | 0.39   | 1.056 (0.998, 1.118) | 0.06   |
| Small HDL-P                                  | -1.19(1.23)  | 0.33   | 1.015 (0.989, 1.042) | 0.26   |
| Total LDL-P                                  | 38.17(13.96) | 0.006  | 1.262 (0.937, 1.701) | 0.13   |

\* Log transformed

BMI: body mass index; cIMT: carotid intima-media thickness; cPlaque: carotid plaque; CRP: C-reactive protein, HDL-C: high-density lipoprotein cholesterol; HDL-P: high-density lipoprotein particles; IL-6: interleukin-6; LDL-C: low-density lipoprotein cholesterol; LDL-P: low-density lipoprotein particles; SBP: systolic blood pressure.

**Table II: Adjusted estimated difference in cIMT (um) per 1SD greater HDL measures**

|          | <b>HDL-C<br/>(SD 15.34 mg/dL)</b> |                    | <b>Total HDL-P<br/>(SD 5.48 umol/L)</b> |                    | <b>Large HDL-P<br/>(SD 1.88 umol/L)</b> |                    | <b>Small HDL-P<br/>(SD 4.04 umol/L)</b> |                    |
|----------|-----------------------------------|--------------------|-----------------------------------------|--------------------|-----------------------------------------|--------------------|-----------------------------------------|--------------------|
|          | <b>β(SE)</b>                      | <b>P<br/>value</b> | <b>β(SE)</b>                            | <b>P<br/>value</b> | <b>β(SE)</b>                            | <b>P<br/>value</b> | <b>β(SE)</b>                            | <b>P<br/>value</b> |
| Model 1  | -19.16(4.40)                      | <.0001             | -10.92(4.26)                            | 0.01               | -14.11(4.28)                            | 0.001              | -8.33(4.27)                             | 0.05               |
| Model 2  | -17.87(4.90)                      | 0.0003             | -13.54(4.47)                            | 0.003              | -14.87(4.48)                            | 0.001              | -11.57(4.49)                            | 0.01               |
| Model 3  | -5.42(5.74)                       | 0.34               | -19.75(5.60)                            | 0.0004             | -17.49(6.85)                            | 0.01               | -18.69(5.25)                            | 0.0004             |
| Model 4* | -----                             |                    | -----                                   |                    | -1.78(9.31)                             | 0.85               | -17.77(7.15)                            | 0.01               |
| Model 5  | -6.79(6.29)                       | 0.28               | -19.69(6.01)                            | 0.001              | -2.05(9.53)                             | 0.83               | -17.41(7.22)                            | 0.02               |

\*Only for large and small HDL-P

Model 1: Adjusted for age, race, study site, and menopausal status

Model 2: Model 1+ BMI, SBP, smoking, physical activity, antihypertensive, lipid lowering medications, ever use hormone replacement therapy, IL-6 and CRP

Model 3: For HDL-C: Model2+ total HDL-P and LDL-P; for total HDL-P, large HDL-P and small HDL-P: Model2+ HDL-C and LDL-P

Model 4: For large HDL-P: Model3+ small HDL-P; for small HDL-P: Model3+ large HDL-P

Model 5: For HDL-C and HDL-P: Model3+ triglycerides and LDL-C; for large and small HDL-P: Model4+ triglycerides and LDL-C

BMI: body mass index; cIMT: carotid intima-media thickness; CRP: C-reactive protein; HDL-C: high-density lipoprotein cholesterol; HDL-P: high-density lipoprotein particles; IL-6: interleukin-6; LDL-C: low-density lipoprotein cholesterol; LDL-P: low-density lipoprotein particles; SBP: systolic blood pressure.

**Table III: Adjusted odds ratio (95% CI) of cPlaque presence per 1SD greater HDL measures**

|          | HDL-C<br>(SD 15.34 mg/dL) |         | Total HDL-P<br>(SD 5.48 umol/L) |         | Large HDL-P<br>(SD 1.88 umol/L) |         | Small HDL-P<br>(SD 4.04 umol/L) |         |
|----------|---------------------------|---------|---------------------------------|---------|---------------------------------|---------|---------------------------------|---------|
|          | OR(95%CI)                 | P value | OR(95%CI)                       | P value | OR(95%CI)                       | P value | OR(95%CI)                       | P value |
| Model 1  | 1.014(0.900, 1.142)       | 0.82    | 1.027(0.916, 1.151)             | 0.65    | 1.020(0.909, 1.144)             | 0.74    | 1.027(0.920, 1.152)             | 0.65    |
| Model 2  | 1.143(0.996, 1.311)       | 0.06    | 1.047(0.924, 1.187)             | 0.47    | 1.079(0.952, 1.223)             | 0.23    | 1.027(0.906, 1.165)             | 0.67    |
| Model 3  | 1.249(1.061, 1.471)       | 0.008   | 0.894(0.761, 1.049)             | 0.17    | 0.878(0.723, 1.065)             | 0.19    | 0.907(0.781, 1.054)             | 0.20    |
| Model 4* | -----                     |         | -----                           |         | 0.920(0.709, 1.194)             | 0.53    | 0.947(0.774, 1.158)             | 0.60    |
| Model 5  | 1.201(1.004, 1.437)       | 0.04    | 0.974(0.820, 1.156)             | 0.76    | 0.993(0.760, 1.298)             | 0.96    | 0.979(0.798, 1.202)             | 0.84    |

\* Only for large and small HDL-P

Model 1: Adjusted for age, race, study site, and menopausal status

Model 2: Model 1+ BMI, SBP, smoking, physical activity, antihypertensive, lipid lowering medications, ever use hormone replacement therapy, interleukin-6 and C-reactive protein

Model 3: For HDL-C: Model2+ total HDL-P and LDL-P; for total HDL-P, large HDL-P and small HDL-P: Model2+ HDL-C and LDL-P

Model 4: For large HDL-P: Model3+ small HDL-P; for small HDL-P: Model3+ large HDL-P

Model 5: For HDL-C and HDL-P: Model3+ triglycerides and LDL-C; for large and small HDL-P: Model4+ triglycerides and LDL-C

BMI: body mass index; cIMT: carotid intima-media thickness; CRP: C-reactive protein; cPlaque: carotid plaque; HDL-C: high-density lipoprotein cholesterol; HDL-P: high-density lipoprotein particles; IL-6: interleukin-6; LDL-C: low-density lipoprotein cholesterol; LDL-P: low-density lipoprotein particles; SBP: systolic blood pressure.
